# Supplementary material for: The Tnt1 Retrotransposon Escapes Silencing in Tobacco, Its Natural Host
Source: PLOS journal article supplement (doi:10.1371/journal.pone.0033816), 2012-03-30
Supplement: S9 (10.1371/journal.pone.0033816.s009) [file journal.pone.0033816.s009]

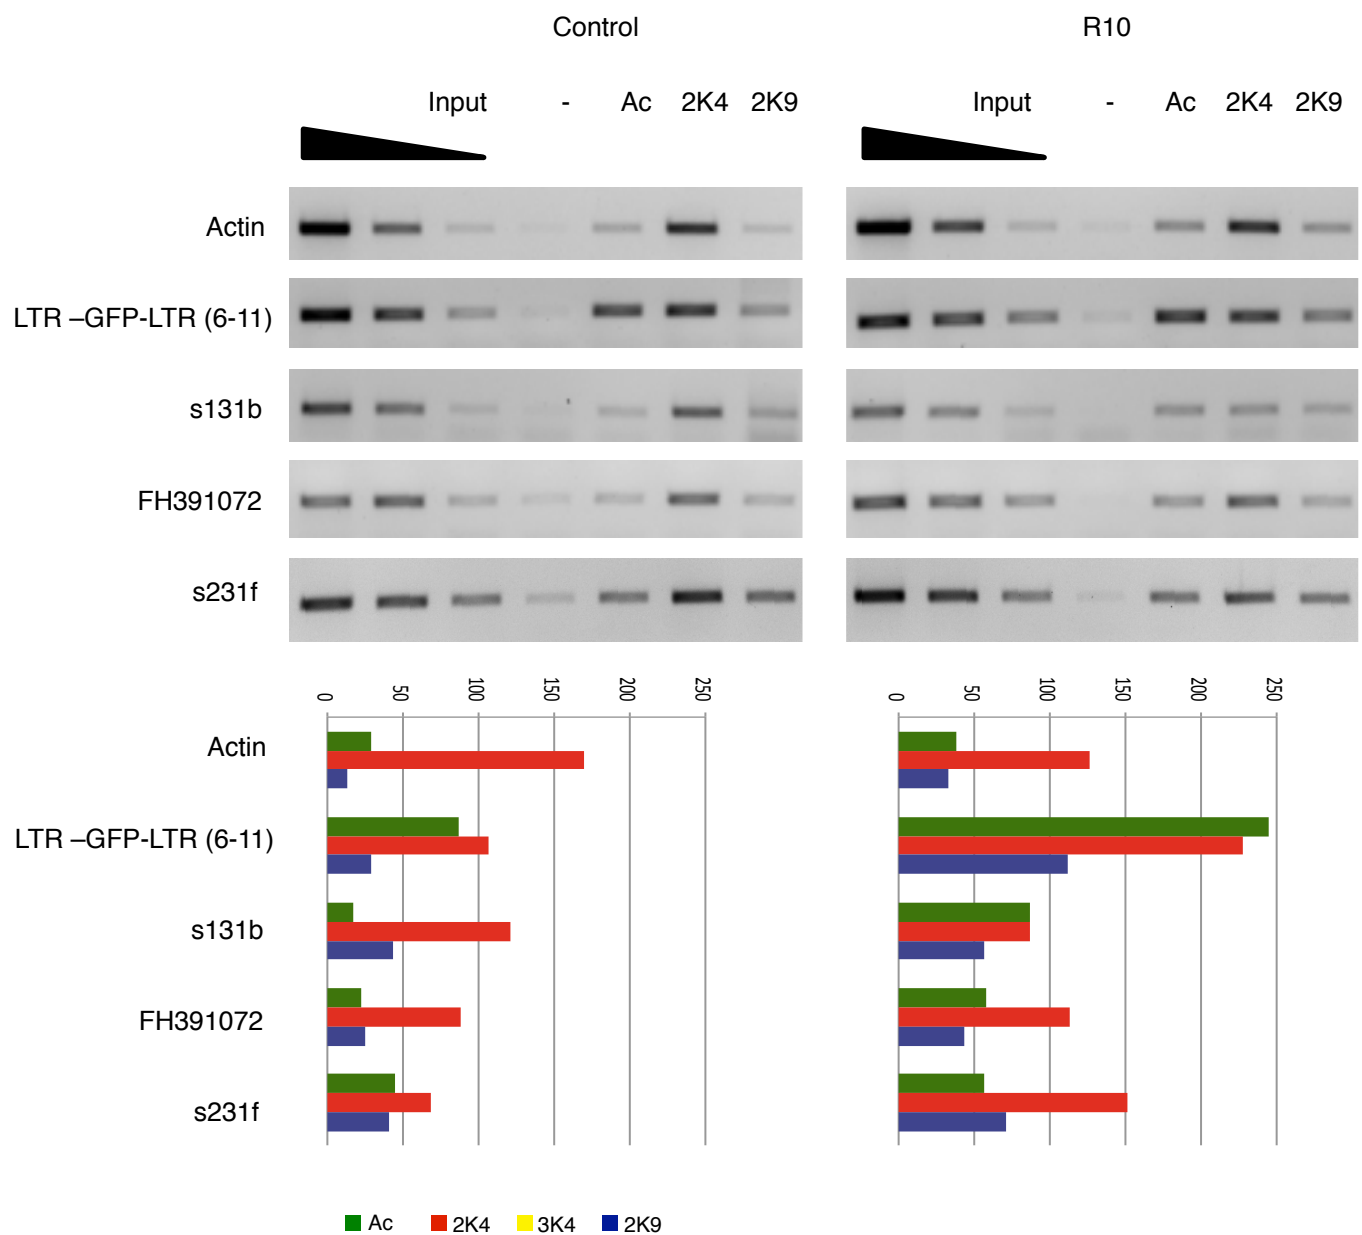

**Supporting Figure S9. Histone epigenetic marks associated with the LTR-GFP-LTR transgene and endogenous Tnt1 elements.** ChIP analyses were performed with the LTR-GFP-LTR transgenic line 6-11 non treated (Control) or treated with R10 (R10) using antibodies recognizing H3 acetylation (Ac), H3K4me2 (2K4), and H3K9me2 (2K9), or no antibody (-). Different endogenous Tnt1 elements tested for, as well as the LTR-GFP-LTR transgene and an actin gene fragment used as control. A quantification of the band intensity relative to the second input dilution is shown below each panel.
